# Supplementary material
Source: PubMed Central journal article supplement (PMC5559204)
Supplement: NIHMS726550-supplement-supplement_1.pdf [file NIHMS726550-supplement-supplement_1.pdf]

## Supplementary Materials

Fig. S1. Induction of type I IFN in cDCs by Heat-iMVA requires cGAS, STING, IRF3, IRF7 and IFNAR1.

Fig. S2. Induction of type I IFN in cDCs by UV-iMVA requires also requires STING.

Fig. S3. Induction of PD-L1 expression on Heat-iMVA-infected B16-F10 cells.

Fig. S4. Induction of type I IFN, proinflammatory cytokines and chemokines, and PD-L1 expression in human melanoma cell line infected with Heat-iMVA.

Fig. S5. Intratumoral injection of Heat-iMVA results in the generation of Granzyme B<sup>+</sup> and Ki67<sup>+</sup> CD8<sup>+</sup> and CD4<sup>+</sup> T cells in the TNDLs.

Fig. S6. Initial B16-F10 tumor volumes at the time of the first injection.

Fig. S7. Intratumoral injection of Heat-iMVA leads to the generation of anti-tumor specific CD8<sup>+</sup> T cells in the TDLNs in a Batf3-dependent manner.

Fig. S8. Intraperitoneal delivery of anti-CTLA-4, anti-PD1, or anti-PD-L1 antibody has minimum survival benefit in a unilateral B16-F10 melanoma implantation model.

Fig. S9. The combination of intratumoral injection of Heat-MVA with systemic delivery of anti-CTLA-4 or anti-PD-L1 antibodies significantly increases the overall response and cure rates in a MC38 bilateral tumor implantation model.

Fig. S10. Intratumoral injection of Heat-iMVA is more effective than poly (I:C) in treating large established tumors.

Fig. S11. The combination of intratumoral injection of Heat-MVA with systemic delivery of immune checkpoint antibodies has synergistic effect in curing large established B16-F10 melanomas.

Table S1. Primer sequences for quantitative real-time PCR for the expression of type I IFN, proinflammatory cytokine and chemokine genes.

## Supplementary Materials

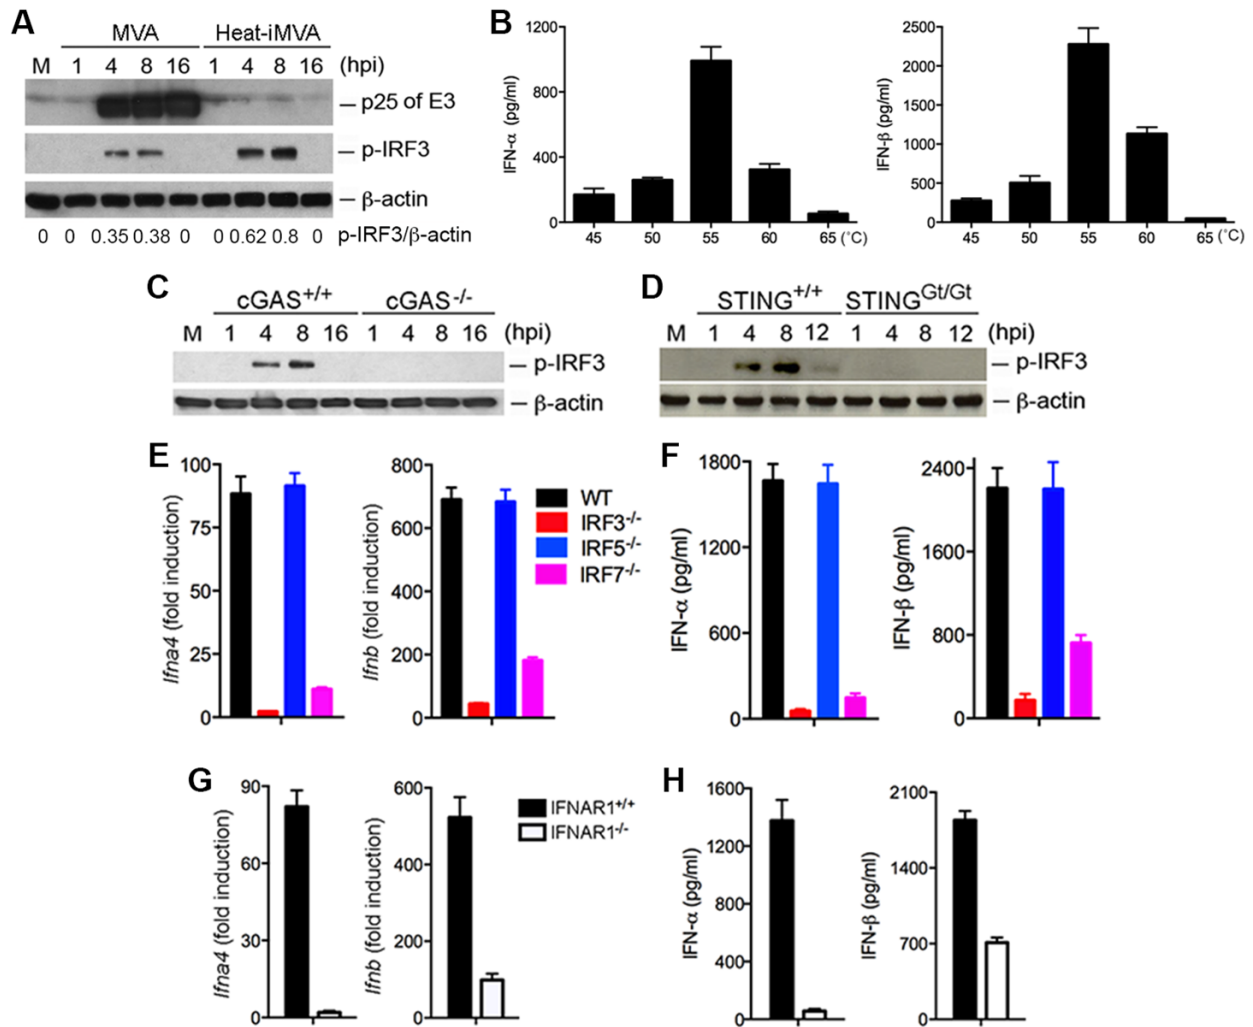

1 Fig. S1. Induction of type I IFN in murine cDCs by Heat-iMVA requires cGAS, STING,  
 2 IRF3, IRF7 and IFNAR1. (A) Western blot showing protein levels of p-IRF3 and vaccinia E3  
 3 in Heat-iMVA or MVA-infected cDCs. The ratios of p-IRF3/β-actin were shown. (B) The effect  
 4 of heating temperature on the abilities of heat-iMVA to induce IFN-α and IFN-β secretion in  
 5 infected cDCs. (C, D) Heat-iMVA infection of cDCs induces phosphorylation of IRF3 that is  
 6 dependent on cGAS (C) and STING (D). Western blot showing protein levels of p-IRF3 and β-  
 7 actin in Heat-iMVA-infected cDCs from cGAS<sup>+/+</sup> and cGAS<sup>-/-</sup> mice (C) and from STING<sup>+/+</sup> and  
 8 STING<sup>Gt/Gt</sup> mice (D). “hpi”, hours post infection. “M”, mock infection control. (E) *Ifna4* and *Ifnb*  
 9 relative mRNA expression compared with no virus control in cDCs generated from WT, IRF3<sup>-/-</sup>,  
 10 IRF7<sup>-/-</sup>, or IRF5<sup>-/-</sup> mice and infected with Heat-iMVA. Data are means ± SEM (n=3). (F)

11 Concentrations of secreted IFN- $\alpha$  and IFN- $\beta$  in the medium of cDCs generated from WT, IRF3<sup>-/-</sup>,  
12 IRF7<sup>-/-</sup>, or IRF5<sup>-/-</sup> mice and infected with Heat-iMVA. Data are means  $\pm$  SEM (n=3). (G) *Ifna4*  
13 and *Ifnb* relative mRNA expression compared with no virus control in cDCs generated from  
14 IFNAR1<sup>+/+</sup> and IFNAR1<sup>-/-</sup> mice and infected with Heat-iMVA. Data are means  $\pm$  SEM (n=3).  
15 (F) Concentrations of secreted IFN- $\alpha$  and IFN- $\beta$  in the medium of cDCs generated from  
16 IFNAR1<sup>+/+</sup> and IFNAR1<sup>-/-</sup> mice and infected with Heat-iMVA. Data are means  $\pm$  SEM (n=3).

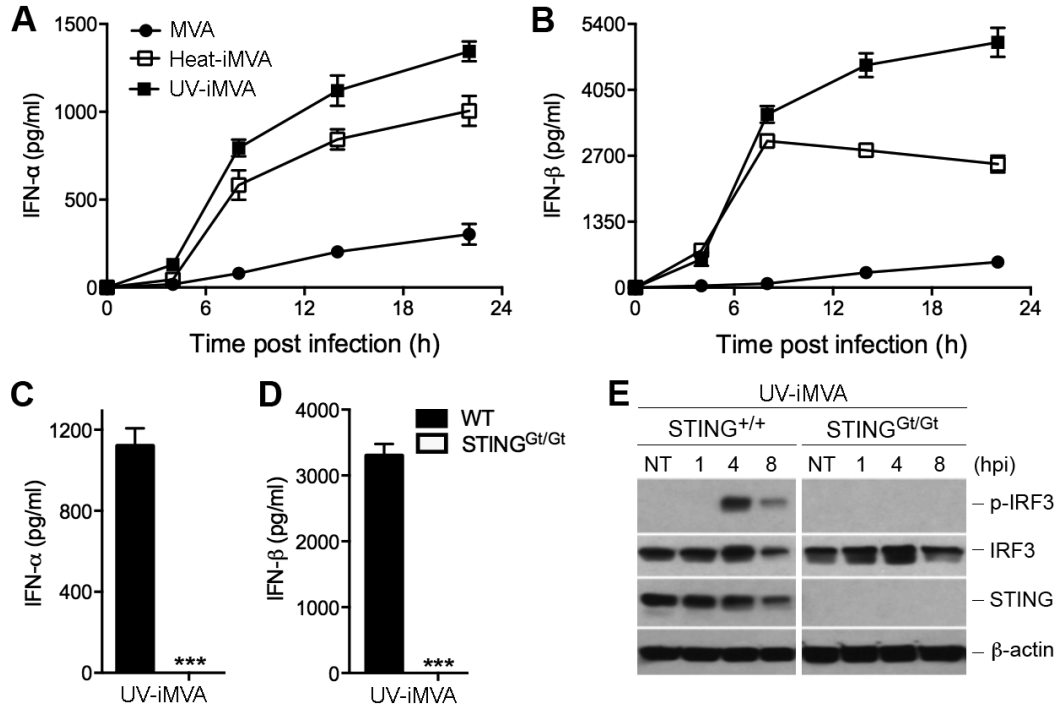

30 Fig. S2. Induction of type I IFN in cDCs by UV-iMVA requires also requires STING. (A, B)  
 31 The concentrations of secreted IFN- $\alpha$  (A) and IFN- $\beta$  (B) in the medium over time following  
 32 MVA, Heat-iMVA, or UV-iMVA infection of cDCs. Data are means  $\pm$  SEM (n=3). (C, D)  
 33 Concentrations of secreted IFN- $\alpha$  (C) and IFN- $\beta$  (D) in the medium of cDCs generated from WT  
 34 and STING<sup>Gt/Gt</sup> mice and infected with UV-iMVA. (n=3; \*\*\* $P$  < 0.001;  $t$  test). (E) Western Blot  
 35 showing protein levels of p-IRF-3, IRF3, STING, and  $\beta$ -actin. "hpi", hours post infection. "NT",  
 36 no treatment control.

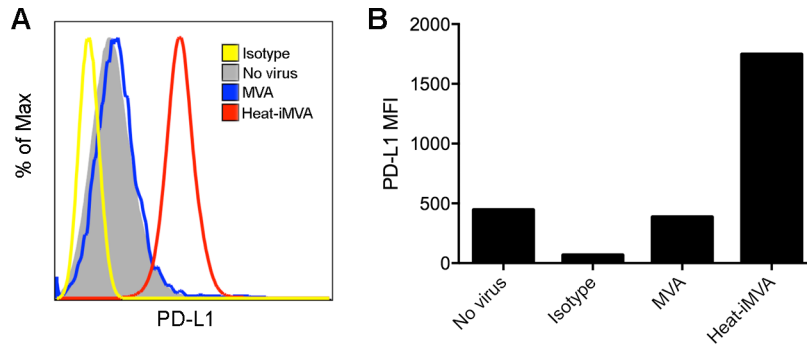

37 Fig. S3. **Induction of PD-L1 expression on Heat-iMVA-infected B16-F10 cells.** (A)  
 38 Representative flow cytometry plot of B16-F10 cells infected with either MVA at a MOI of 10 or  
 39 with an equivalent amount of Heat-iMVA. No virus infection and isotype control were also  
 40 included. (B) The mean fluorescence intensity (MFI) of PD-L1 expression on B16-F10 cells  
 41 infected with either MVA, Heat-iMVA, or mock infection control is shown.

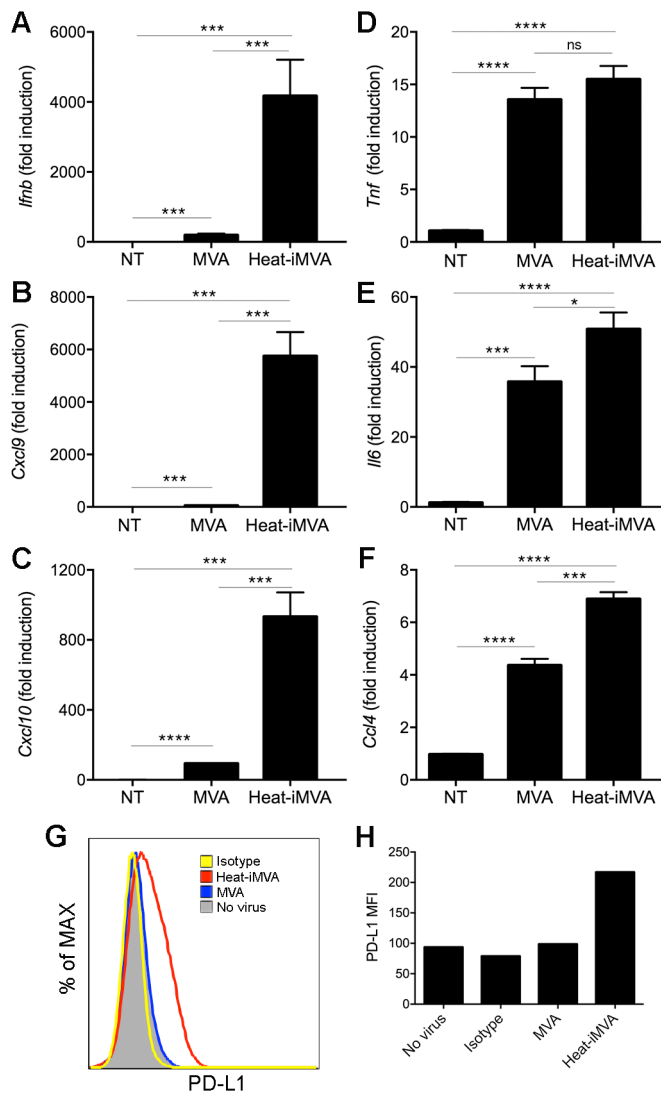

42 Fig. S4. Induction of type I IFN, proinflammatory cytokines and chemokines, and PD-L1  
 43 expression in human melanoma cell line infected with Heat-iMVA. (A-F) Human melanoma  
 44 cell line SK-MEL-146 cells were infected with MVA at a MOI of 10 or with an equivalent  
 45 amount of Heat-iMVA. Cells were collected at 6 h post infection and RNAs were extracted.  
 46 Quantitative real-time PCR was performed. The relative mRNA expression of *Ifnb*, *Cxcl9*,  
 47 *Cxcl10*, *Tnf*, *Il6*, *Ccl4*, and *Ccl5* in B16-F10 cells infected with either MVA or Heat-iMVA.  
 48 (n=3; \*\*\* $P < 0.001$ ; \*\*\*\* $P < 0.0001$ ;  $t$  test). (G, H) Expression of PD-L1 on SK-MEL-146 cells  
 49 infected with either MVA, Heat-iMVA or mock infection control. Representative flow cytometry  
 50 plot is shown in (G), repeated once. (H) The mean fluorescence intensity (MFI) of PD-L1  
 51 expression on SK-MEL-146 cells infected with either MVA, Heat-iMVA, or mock infection  
 52 control is shown.

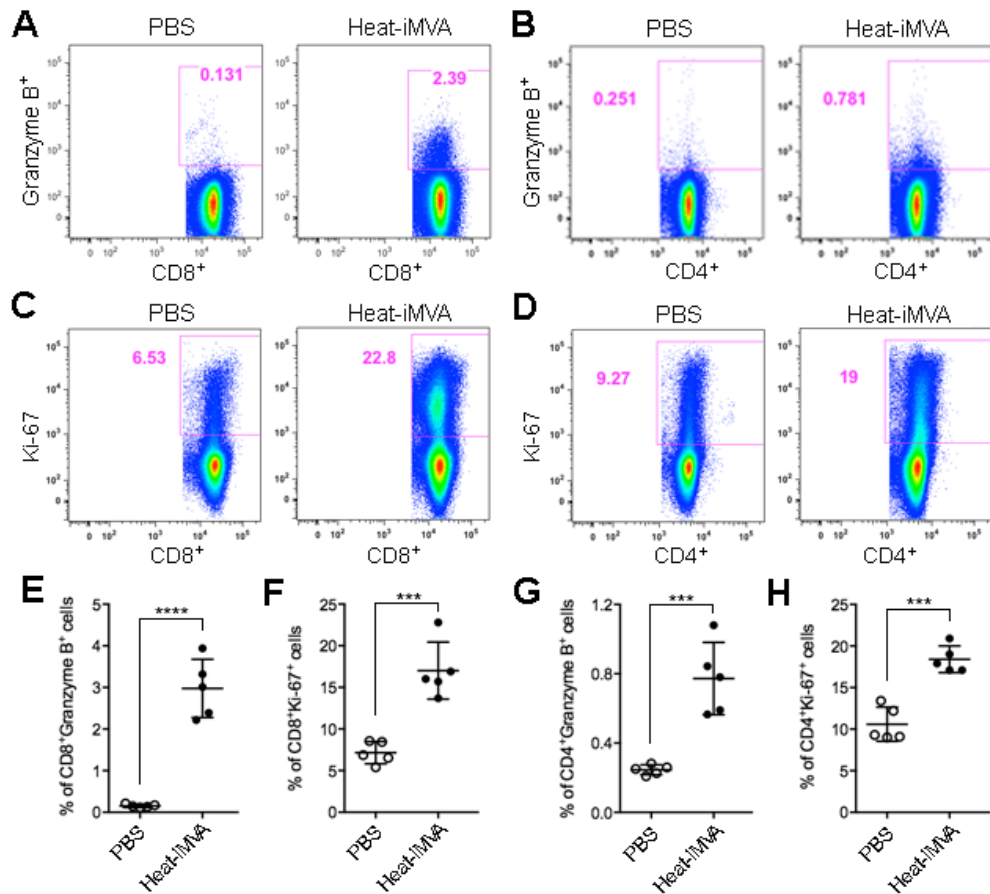

53 Fig. S5. **Intratumoral injection of Heat-iMVA results in the generation of Granzyme B<sup>+</sup> and**  
 54 **Ki67<sup>+</sup> CD8<sup>+</sup> and CD4<sup>+</sup> T cells in the TNDLs.** 5 x 10<sup>5</sup> B16-F10 melanoma cells were implanted  
 55 intradermally to the right flank of the mice. Seven days post implantation, either Heat-iMVA (an  
 56 equivalent of 2x 10<sup>7</sup> pfu of MVA) or PBS were injected into the tumors on the right flank. The  
 57 injections were repeated three days later. TDLNs were harvested 3 days post last injection and  
 58 cell suspensions were generated. Immune cells were stained with various markers and analyzed  
 59 by FACS. (A-D) Representative flow cytometry plot of CD8<sup>+</sup> cells expressing Granzyme B<sup>+</sup> (A)  
 60 or Ki-67 (C), CD4<sup>+</sup> cells expressing Granzyme B (B), or Ki-67 (D). (E-H) Percentages of  
 61 CD8<sup>+</sup>Granzyme B<sup>+</sup> (E), CD8<sup>+</sup>Ki-67<sup>+</sup> (F), CD4<sup>+</sup>Granzyme B<sup>+</sup> (G), and CD4<sup>+</sup>Ki67<sup>+</sup> (H) cells  
 62 within TNLNs of mice treated with PBS (n=5) or Heat-iMVA (n=5; \*\*\**P* < 0.001; \*\*\*\**P* <  
 63 0.0001; *t* test). A representative experiment is shown, repeated once.

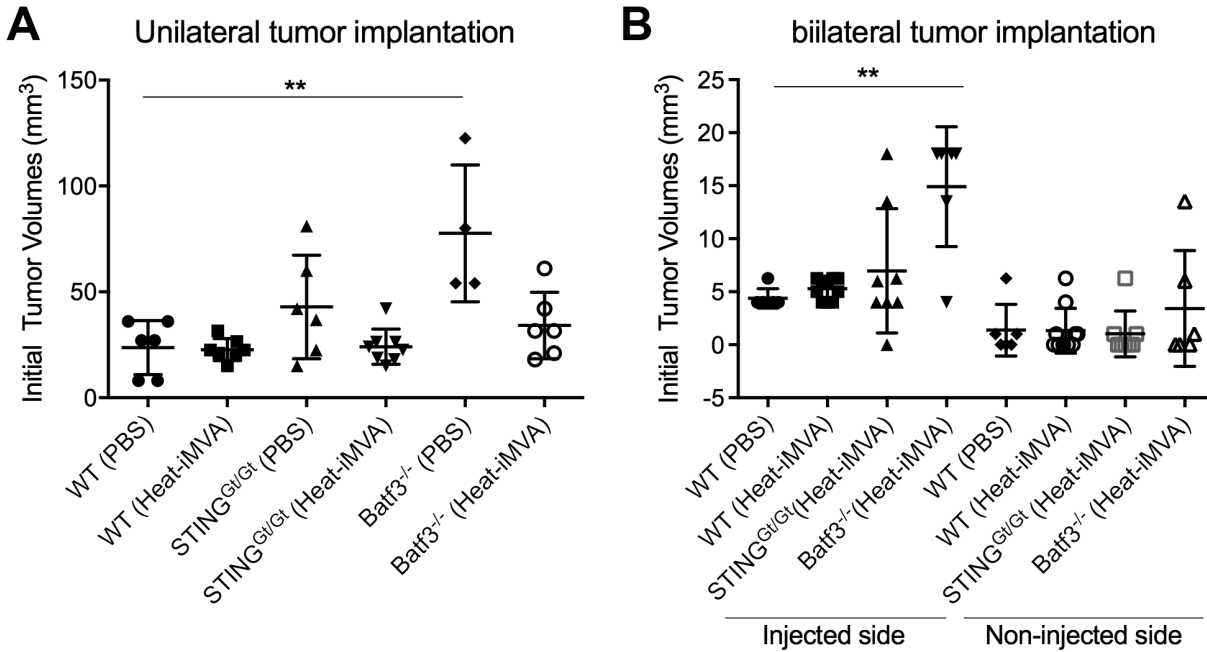

64 Fig. S6. **Initial B16-F10 tumor volumes at the time of the first injection.** (A) Unilateral tumor  
 65 implantation model. B16-F10 melanoma cells ( $1 \times 10^5$  cells) were intradermally implanted into  
 66 the right flank of WT C57B/6, STING<sup>Gt/Gt</sup>, or Batf3<sup>-/-</sup> mice. At 11 days post-implantation, the  
 67 tumors were injected with either Heat-iMVA (equivalent of  $2 \times 10^7$  pfu) or PBS twice weekly.  
 68 The initial tumor volumes at the time of first injection are shown ( $n=5$ ;  $**P < 0.01$ ;  $t$  test). (B)  
 69 Bilateral tumor implantation model. B16-F10 melanoma cells were implanted intradermally to  
 70 the left and right flanks of C57B/6 mice ( $5 \times 10^5$  to the right flank and  $1 \times 10^5$  to the left flank). 8  
 71 days after tumor implantation, Heat-iMVA or PBS was injected to the larger tumors on the right  
 72 flank. The initial tumor volumes at the time of first injection are shown ( $n=5, 6$ ;  $**P < 0.01$ ;  $t$   
 73 test).



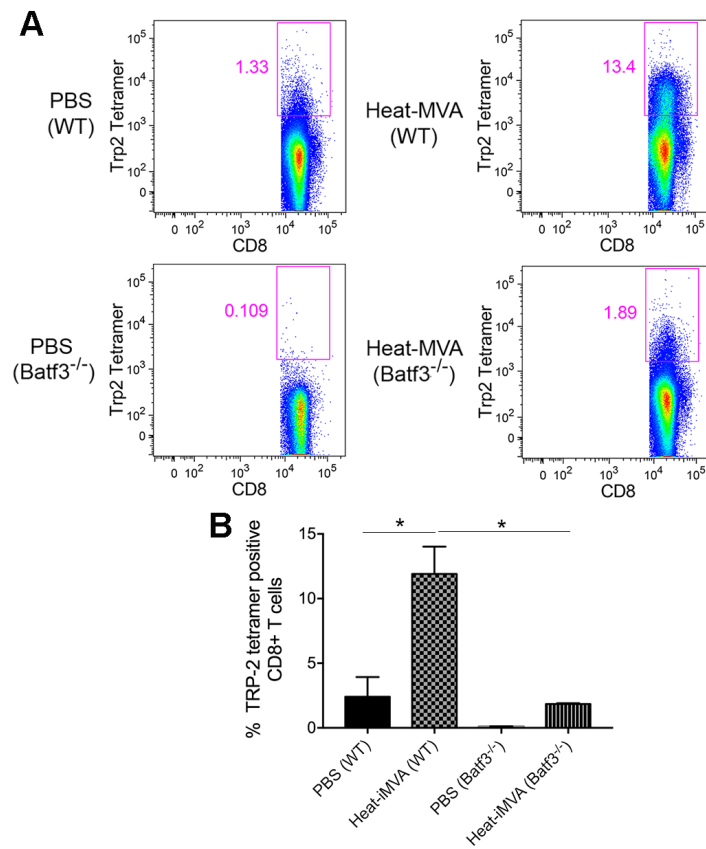

**Fig. S7. Intratumoral injection of Heat-iMVA leads to the generation of anti-tumor specific CD8<sup>+</sup> T cells in the TDLNs in a Batf3-dependent manner.** (A) Representative flow cytometry plots of TRP-2 tetramer positive CD8<sup>+</sup> T cells in TDLNs in a B16-F10 melanoma model treated with either PBS or Heat-inactivated MVA. (B) Percentages of TRP-2 tetramer positive CD8<sup>+</sup> T cells in WT and Batf3<sup>-/-</sup> mice with B16-F10 melanomas treated with either PBS or Heat-MVA. Each sample was from lymph nodes pooled from 2-3 mice treated with the same condition (n=3; \*P < 0.05; *t* test).

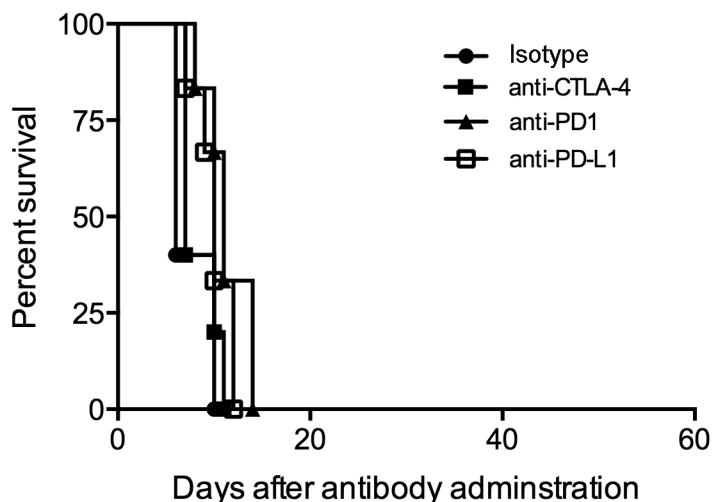

74 Fig. S8. **Intraperitoneal delivery of anti-CTLA-4, anti-PD1, or anti-PD-L1 antibody has**  
 75 **minimum survival benefit in a unilateral B16-F10 melanoma implantation model.** B16-F10  
 76 melanoma ( $1 \times 10^5$  cells) were implanted intradermally into the shaved skin on the right flank of  
 77 WT C57BL/6J mice. 8 days post implantation, mice were treated with intraperitoneal delivery of  
 78 anti-CTLA-4 (100  $\mu$ g), anti-PD1 (250  $\mu$ g), anti-PD-L1 (250  $\mu$ g), or isotype control twice a week  
 79 (every 3-4 days). Kaplan-Meier survival curve is shown for isotype control (n=5), anti-CTLA-4-  
 80 treated mice (n=6), anti-PD1-treated mice (n=6), and anti-PD-L1-treated mice (n=6).

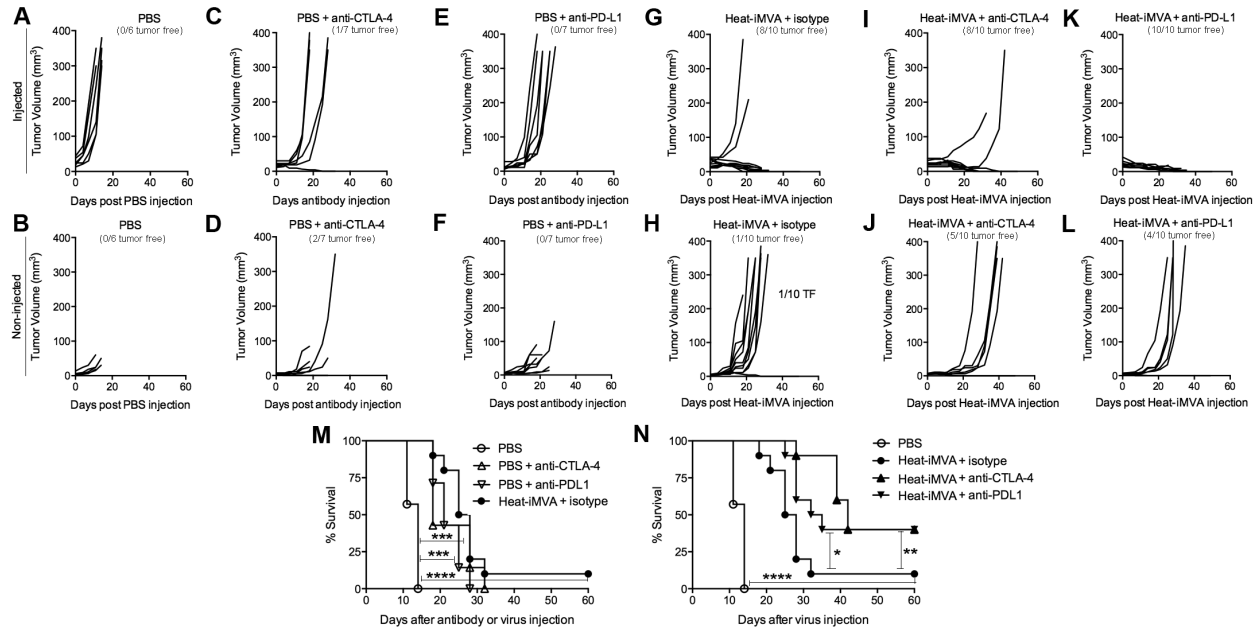

81  
 82 **Fig. S9. The combination of intratumoral injection of Heat-MVA with systemic delivery of**  
 83 **anti-CTLA-4 or anti-PD-L1 antibodies significantly increases the overall response and cure**  
 84 **rates in a MC38 bilateral tumor implantation model. (A-L) Volumes of injected (A) and non-**  
 85 **injected (B) tumor volume over days after PBS injection, after intratumoral injection of PBS and**  
 86 **intraperitoneal delivery of anti-CTLA-4 antibody (C, D), after intratumoral injection of PBS and**  
 87 **intraperitoneal delivery of anti-anti-PD-L1 antibody (E, F), after intratumoral injection of Heat-**  
 88 **MVA and intraperitoneal delivery of isotype antibody control (G, H), after intratumoral injection**  
 89 **of Heat-MVA and intraperitoneal delivery of anti-CTLA-4 antibody (I, J), after intratumoral**  
 90 **injection of Heat-MVA and intraperitoneal delivery of anti-PD-L1 antibody (K, L). (M) Kaplan-**  
 91 **Meier survival curve of tumor-bearing mice treated with PBS (n=6), anti-CTLA4 antibody**  
 92 **(n=7), or anti-PD-L1 antibody (n=7; \*\*\**P* < 0.001, Mantel-Cox test). (N) Kaplan-Meier survival**  
 93 **curve of tumor-bearing mice treated with PBS (n=6), Heat-MVA + isotype control (n=10), Heat-**  
 94 **MVA + anti-CTLA4 antibody (n=10), or Heat-MVA + anti-PD-L1 antibody (n=10; \**P* < 0.05;**  
 95 **\*\**P* < 0.01; \*\*\*\**P* < 0.0001; Mantel-Cox test). A representative experiment is shown, repeated**  
 96 **once.**

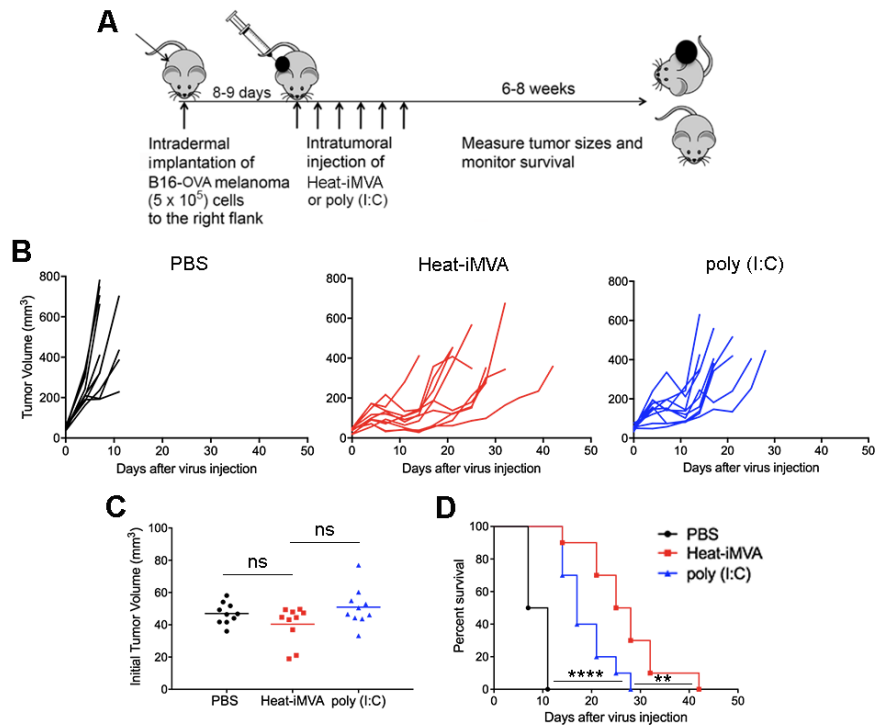

97 Fig. S10. **Intratumoral injection of Heat-iMVA is more effective than poly (I:C) in treating**  
 98 **large established tumors.** (A) Schematic diagram of a unilateral tumor implantation model with  
 99 large established B16-OVA model. B16-OVA melanoma cells ( $5 \times 10^5$  cells) were implanted  
 100 intradermally to the right flanks of C57B/6 mice. 8-9 days after tumor implantation, mice were  
 101 intratumorally injected with Heat-iMVA, poly (I:C), or PBS mock control twice weekly. Tumor  
 102 sizes were measured and the survival of mice was monitored. (B) Volumes of injected tumors  
 103 over days after injections with PBS, Heat-iMVA, or poly (I:C). (C) Initial tumor volumes on the  
 104 day of first injection. (D) Kaplan-Meier survival curve of tumor-bearing mice treated with PBS,  
 105 Heat-MVA, or poly (I:C) intratumorally (n=10; \*\*P < 0.01; \*\*\*\*P < 0.0001; Mantel-Cox test).

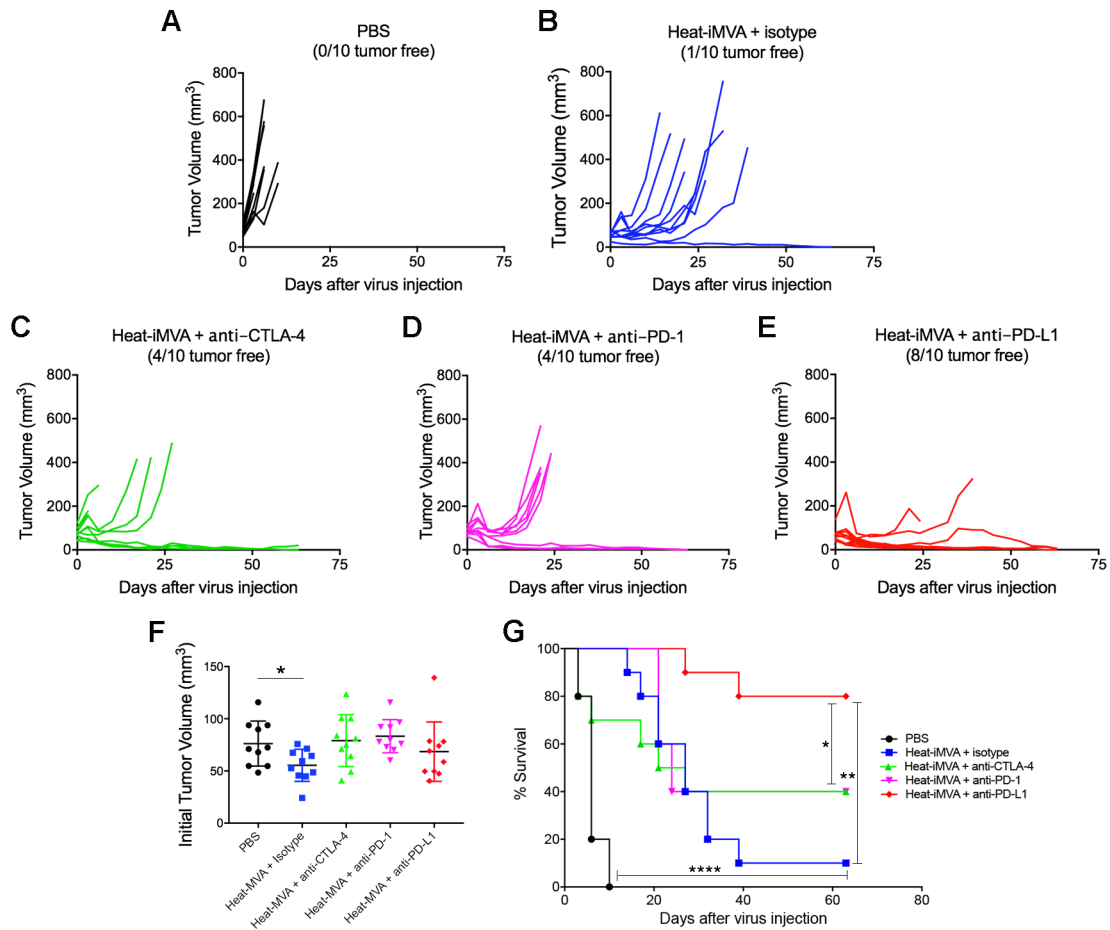

106 Fig. S11. **The combination of intratumoral injection of Heat-MVA with systemic delivery of**  
 107 **immune checkpoint antibodies has synergistic effect in curing large established B16-F10**  
 108 **melanomas.** (A) Schematic diagram of a unilateral tumor implantation model with large  
 109 established B16-F10 melanoma model. B16-F10 melanoma cells ( $5 \times 10^5$  cells) were implanted  
 110 intradermally to the right flanks of C57B/6 mice. 8-9 days after tumor implantation, mice were  
 111 intratumorally injected with  $2 \times 10^7$  pfu of Heat-MVA twice weekly in the presence or absence  
 112 of intraperitoneal delivery of anti-CTLA-4, anti-PD-1, or anti-PD-L1 antibodies. Tumor sizes  
 113 were measured and the survival of mice was monitored. (B) Volumes of injected tumors over  
 114 days after injections with PBS, or with Heat-iMVA in the presence of isotype control, or anti-  
 115 CTLA-4, or anti-PD-1, or anti-PD-L1. (C) Initial tumor volumes prior to first treatment (n= 10;  
 116  $*P < 0.05$ ; *t* test). (D) Kaplan-Meier survival curve of tumor-bearing mice treated with PBS, or  
 117 Heat-iMVA in the presence of isotype control, or anti-CTLA-4, or anti-PD-1, or anti-PD-L1  
 118 antibodies (n=10;  $*P < 0.05$ ,  $**P < 0.01$ ,  $****P < 0.0001$ ; Mantel-Cox test).

|                 |                                |
|-----------------|--------------------------------|
| mIFNA4 forward  | 5'-CCTGTGTGATGCAGGAACC-3'      |
| mIFNA4 reverse  | 5'-TCACCTCCCAGGCACAGA-3'       |
| mIFNB forward   | 5'-TGGAGATGACGGAGAAGATG-3'     |
| mIFNB reverse   | 5'-TTGGATGGCAAAGGCAGT-3'       |
| mIL6 forward    | 5'-AGGCATAACGCACTAGGTTT-3'     |
| mIL6 reverse    | 5'-AGCTGGAGTCACAGAAGGAG-3'     |
| mCCL4 forward   | 5'-GCCCTCTCTCTCCTCTTGCT-3'     |
| mCCL4 reverse   | 5'-CTGGTCTCATAGTAATCCATC-3'    |
| mCCL5 forward   | 5'-GCCACGTCAAGGAGTATTTCTA-3'   |
| mCCL5 reverse   | 5'-ACACACTTGGCGGTTTCCTTC-3'    |
| mCXCL10 forward | 5'-GTCAGGTTGCCTCTGTCTCA-3'     |
| mCXCL10 reverse | 5'-TCAGGGAAGAGTCTGGAAAG-3'     |
| mGAPDH forward  | 5'-ATCAAGAAGGTGGTGAAGCA-3'     |
| mGAPDH reverse  | 5'-AGACAACCTGGTCCTCAGTGT-3'    |
| hIFNB forward   | 5'-GCACTGGCTGGAATGAGACT-3'     |
| hIFNB reverse   | 5'-CCTTGGCCTTCAGGTAATG-3'      |
| hTNF forward    | 5'-AATAGGCTGTTCCCATGTAGC-3'    |
| hTNF reverse    | 5'-AGAGGCTCAGCAATGAGTGA-3'     |
| hIL6 forward    | 5'-AATTCGGTACATCCTCGACGG-3'    |
| hIL6 reverse    | 5'-TTGGAAGGTTTCAGGTTGTTTTCT-3' |
| hCCL4 forward   | 5'-AAAACCTCTTTGCCACCAATACC-3'  |
| hCCL4 reverse   | 5'-GAGAGCAGAAGGCAGCTACTAG-3'   |
| hCXCL9 forward  | 5'-AAACCCAGATTCAGCAGATG-3'     |
| hCXCL9 reverse  | 5'-TCTTTTGACGAGAACGTTGAGA-3'   |
| hCXCL10 forward | 5'-ATTTGCTGCCTTATCTTTCTG-3'    |
| hCXCL10 reverse | 5'-TCTCACCTTCTTTTTTCATTGTAG-3' |
| hGAPDH forward  | 5'-ATCAAGAAGGTGGTGAAGCA-3'     |
| hGAPDH reverse  | 5'-GTCGCTGTTGAAGTCAGAGGA-3'    |

119 Table S1. **Primer sequences for quantitative real-time PCR for the expression of type I IFN,**  
120 **proinflammatory cytokine and chemokine genes.**
